# Supplementary material for: MicroRNAs 145 and 148a Are Upregulated During Congenital Zika Virus Infection
Source: PubMed Central journal article supplement — ASN Neuro. 2019 Jun 19;11:1759091419850983. doi: 10.1177/1759091419850983 (PMC6585135; doi:10.1177/1759091419850983), 2019-06-19
Supplement: Supplemental_Material6.pdf [file Supplemental_Material6.pdf]

**–Supplemental table 5. Mortality causes of Zika newborns and negative controls at the same gestational age.**

|                                                               | Control-1                 | Control-2         | Control-3       | ZIKV-1                                                                                                                      | ZIKV-2                                                                                                  | ZIKV-3                                                                                                                      | ZIKV-4                                                                                                                                                                            | ZIKV-5                                                                                                                      |
|---------------------------------------------------------------|---------------------------|-------------------|-----------------|-----------------------------------------------------------------------------------------------------------------------------|---------------------------------------------------------------------------------------------------------|-----------------------------------------------------------------------------------------------------------------------------|-----------------------------------------------------------------------------------------------------------------------------------------------------------------------------------|-----------------------------------------------------------------------------------------------------------------------------|
| Sex                                                           | Male                      | Male              | Female          | Female                                                                                                                      | Male                                                                                                    | Male                                                                                                                        | Male                                                                                                                                                                              | Male                                                                                                                        |
| Gestational week at birth                                     | 33                        | 41                | 33              | 36                                                                                                                          | 41                                                                                                      | 41                                                                                                                          | 41                                                                                                                                                                                | 38                                                                                                                          |
| Zika RT-PCR or serology (IgM and IgG) positive <sup>a</sup>   | negative                  | negative          | negative        | Blood (mother)<br>Brain, amniotic fluid, liver, renal tubules, adrenal                                                      | Blood (mother)<br>Brain, amniotic fluid, renal tubules                                                  | Blood (mother)<br>Brain, amniotic fluid, liver, spleen                                                                      | Liver, heart                                                                                                                                                                      | Brain                                                                                                                       |
| STORCH <sup>b</sup> and arboviruses <sup>c</sup> serology IgM | negative                  | negative          | negative        | negative                                                                                                                    | negative                                                                                                | negative                                                                                                                    | negative                                                                                                                                                                          | negative                                                                                                                    |
| mortality cause                                               | necrotizing enterocolitis | perinatal hypoxia | hydrops fetalis | Zika Congenital Syndrome (chronic meningitis, microcephaly, ventriculomegaly, intracerebral calcifications, arthrogryposis) | Zika Congenital Syndrome (microcephaly, ventriculomegaly, intracerebral calcifications, arthrogryposis) | Zika Congenital Syndrome (chronic meningitis, microcephaly, ventriculomegaly, intracerebral calcifications, arthrogryposis) | Zika Congenital Syndrome (chronic meningitis, microcephaly, hydrocephalus, hypoplasia (lung), thymic hyperplasia, ventriculomegaly, intracerebral calcifications, arthrogryposis) | Zika Congenital Syndrome (chronic meningitis, microcephaly, ventriculomegaly, intracerebral calcifications, arthrogryposis) |

a – Zika RT-PCR interrogated in the stillborn tissues (brain, amniotic fluid, liver, renal tubules, adrenal, spleen and heart) and IgM/IgG serology in the mother (blood).

b – STORCH (Syphilis, Cytomegalovirus, Herpes Virus 1/2, Toxoplasma gondii, and Rubella Virus) IgM serology investigated in the mother (plasma).

c – Dengue and Chikungunya IgM serology investigated in the mother (plasma).
